# Supplementary material for: Are Uncertainty Categories in a Wind Farm Annual Energy Production Estimate Actually Uncorrelated?
Source: Copernicus journal article supplement (doi:10.5194/wes-2019-82), 2019-12-19
Supplement: Supplementary file 1 [file wes-2019-82-supplement.pdf]

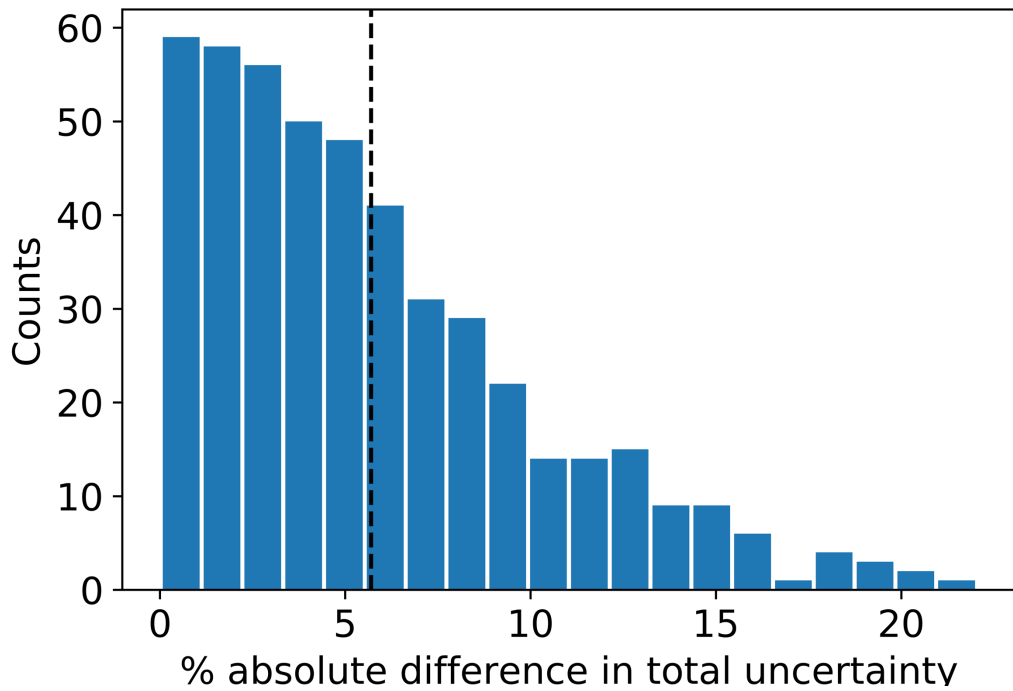

Figure 1: Histogram of absolute percentage differences between the uncertainties calculated using the two different approaches.
